# Supplementary material for: Computational design of ring-expanded pyrimidine-based DNA motifs with improved conductivity
Source: Royal Society of Chemistry journal article supplement (doi:10.1039/c0cp02297g), 2011-01-01
Supplement: c0cp02297g.pdf [file c0cp02297g.pdf]

## Computational Design of the Ring-Expanded Pyrimidine-Based DNA Motifs with Improved Conductivity

Li Han, Yuxiang Bu \*

*The Center for Modeling & Simulation Chemistry, Institute of Theoretical Chemistry,  
Shandong University, Jinan, 250100, P.R. China*

### Supporting Information Materials

**Table S1.** Hydrogen-bond lengths of **G-nC** and **A-nT** (in angstrom, the natural pairs included)

|          | <b>G-nC</b>                            |                                        |                                        | <b>A-nT</b>                            |                                        |
|----------|----------------------------------------|----------------------------------------|----------------------------------------|----------------------------------------|----------------------------------------|
|          | <b>O<sub>6</sub>···H-N<sub>4</sub></b> | <b>N<sub>1</sub>-H···N<sub>3</sub></b> | <b>N<sub>1</sub>-H···O<sub>2</sub></b> | <b>N<sub>6</sub>-H···O<sub>4</sub></b> | <b>N<sub>1</sub>···H-N<sub>3</sub></b> |
| Natural  | 2.834                                  | 2.971                                  | 2.951                                  | 2.952                                  | 2.913                                  |
| <b>x</b> | 2.818                                  | 2.980                                  | 2.937                                  | 2.964                                  | 2.915                                  |
| <b>1</b> | 2.834                                  | 2.969                                  | 2.965                                  | 2.964                                  | 2.910                                  |
| <b>2</b> | 2.832                                  | 2.974                                  | 2.928                                  | 2.934                                  | 2.932                                  |
| <b>3</b> | 2.814                                  | 2.976                                  | 2.910                                  | 2.950                                  | 2.928                                  |
| <b>4</b> | 2.820                                  | 2.976                                  | 2.936                                  | 2.955                                  | 2.917                                  |

---

\* To whom the correspondence should be addressed: Yuxiang Bu, E-mail: [byx@sdu.edu.cn](mailto:byx@sdu.edu.cn)

**Table S2.** NMR parameters of WC hydrogen bonds in natural and size-expanded base pairs.

All of the NMR parameters were calculated at the B3LYP/6-311+G\* level

| Base pair   | Hydrogen Bonds | $J_{ON}/J_{NN}$ | $\delta(^1H)$ | E(2)                                |                                     | $\Delta E_{LP \rightarrow \sigma^*}$    |                                         |
|-------------|----------------|-----------------|---------------|-------------------------------------|-------------------------------------|-----------------------------------------|-----------------------------------------|
|             |                |                 |               | $E(2)_{LP(1) \rightarrow \sigma^*}$ | $E(2)_{LP(2) \rightarrow \sigma^*}$ | $\Delta E_{LP(2) \rightarrow \sigma^*}$ | $\Delta E_{LP(2) \rightarrow \sigma^*}$ |
| <b>G-C</b>  | HB(O...H-N)    | -5.07           | 9.6           | 6.7                                 | 12.5                                | 684.0                                   | 426.7                                   |
|             | HB(N-H...N)    | 2.48            | 11.4          | 16.9                                |                                     | 489.5                                   |                                         |
|             | HB(N-H...O)    | -3.38           | 7.2           | 3.6                                 | 7.8                                 | 715.4                                   | 445.5                                   |
| <b>G-xC</b> | HB(O...H-N)    | -5.31           | 10.2          | 7.4                                 | 14.4                                | 652.6                                   | 401.6                                   |
|             | HB(N-H...N)    | 2.41            | 11.5          | 16.6                                |                                     | 489.5                                   |                                         |
|             | HB(N-H...O)    | -3.60           | 7.4           | 4.2                                 | 8.7                                 | 671.4                                   | 401.6                                   |
| <b>G-1C</b> | HB(O...H-N)    | -5.08           | 10.1          | 7.0                                 | 12.0                                | 684.0                                   | 426.7                                   |
|             | HB(N-H...N)    | 2.46            | 11.5          | 16.9                                |                                     | 489.5                                   |                                         |
|             | HB(N-H...O)    | -3.24           | 7.2           | 3.6                                 | 13.6                                | 709.1                                   | 458.0                                   |
| <b>G-2C</b> | HB(O...H-N)    | -5.08           | 9.6           | 8.7                                 | 18.1                                | 552.2                                   | 301.2                                   |
|             | HB(N-H...N)    | 2.50            | 11.6          | 16.3                                |                                     | 476.9                                   |                                         |
|             | HB(N-H...O)    | -3.68           | 7.5           | 4.0                                 | 8.5                                 | 721.6                                   | 445.5                                   |
| <b>G-3C</b> | HB(O...H-N)    | -5.39           | 9.9           | 6.9                                 | 13.7                                | 677.7                                   | 426.7                                   |
|             | HB(N-H...N)    | 2.48            | 11.5          | 17.0                                |                                     | 476.9                                   |                                         |
|             | HB(N-H...O)    | -3.96           | 7.7           | 4.3                                 | 9.2                                 | 709.1                                   | 451.8                                   |
| <b>G-4C</b> | HB(O...H-N)    | -5.37           | 9.9           | 7.1                                 | 13.1                                | 677.7                                   | 426.7                                   |
|             | HB(N-H...N)    | 2.43            | 11.4          | 17.1                                |                                     | 476.9                                   |                                         |
|             | HB(N-H...O)    | -3.60           | 7.4           | 3.8                                 | 8.5                                 | 715.4                                   | 439.3                                   |
| <b>A-T</b>  | HB(N-H...O)    | -3.28           | 8.0           | 4.1                                 | 6.7                                 | 715.4                                   | 445.5                                   |
|             | HB(N...H-N)    | 3.24            | 12.8          | 21.9                                |                                     | 470.6                                   |                                         |
| <b>A-xT</b> | HB(N-H...O)    | -3.15           | 7.9           | 4.1                                 | 8.2                                 | 684.0                                   | 414.2                                   |
|             | HB(N...H-N)    | 3.23            | 12.9          | 19.6                                |                                     | 508.3                                   |                                         |
| <b>A-1T</b> | HB(N-H...O)    | -3.08           | 7.9           | 3.9                                 | 6.3                                 | 715.4                                   | 445.5                                   |
|             | HB(N...H-N)    | 3.27            | 13.0          | 22.6                                |                                     | 464.4                                   |                                         |
| <b>A-2T</b> | HB(N-H...O)    | -3.54           | 8.2           | 5.8                                 | 8.1                                 | 690.3                                   | 420.4                                   |
|             | HB(N...H-N)    | 3.07            | 12.3          | 20.3                                |                                     | 470.6                                   |                                         |
| <b>A-3T</b> | HB(N-H...O)    | -3.36           | 8.0           | 4.0                                 | 6.4                                 | 709.1                                   | 439.3                                   |
|             | HB(N...H-N)    | 3.11            | 12.3          | 20.4                                |                                     | 476.9                                   |                                         |
| <b>A-4T</b> | HB(N-H...O)    | -3.24           | 7.8           | 4.1                                 | 6.6                                 | 715.4                                   | 445.5                                   |
|             | HB(N...H-N)    | 3.22            | 12.5          | 21.7                                |                                     | 464.4                                   |                                         |

**Table S3.** Vertical transition energies (scaled by a factor of 0.72), oscillator strengths and assignments of several significant singlet excited-states of the natural and the size-expanded G-C and A-T pairs. All these results were determined using CIS method

| States |                 | E/eV        | <i>f</i>       | Assign.           | States |                 | E/eV        | <i>f</i>      | Assign.        |
|--------|-----------------|-------------|----------------|-------------------|--------|-----------------|-------------|---------------|----------------|
| G-C    | S <sub>1</sub>  | 4.63        | 0.1115         | $\pi_G\pi_G^{*C}$ | A-T    | S <sub>1</sub>  | 4.75        | 0.2527        | $\pi_A\pi_A^*$ |
|        | S <sub>2</sub>  | 4.70        | 0.3263         | $\pi_C\pi_C^*$    |        | S <sub>2</sub>  | 4.76        | 0.2962        | $\pi_T\pi_T^*$ |
|        | S <sub>4</sub>  | 5.28        | 0.0012         | $n_G^C\pi_G^{*C}$ |        | S <sub>4</sub>  | 4.83        | 0.0002        | $n_T^A\pi_T^*$ |
|        | S <sub>5</sub>  | 5.41        | 0.0014         | $n_C^G\pi_C^*$    |        | S <sub>7</sub>  | 5.64        | 0.0014        | $n_A^T\pi_A^*$ |
|        | S <sub>11</sub> | <b>5.88</b> | <b>0.0004</b>  | $\pi_G\pi_C^*$    |        | S <sub>20</sub> | <b>6.60</b> | <b>0.0139</b> | $\pi_A\pi_T^*$ |
| G-xC   | S <sub>1</sub>  | 3.98        | 0.1562         | $\pi_C\pi_C^*$    | A-xT   | S <sub>1</sub>  | 3.99        | 0.1316        | $\pi_T\pi_T^*$ |
|        | S <sub>3</sub>  | 4.64        | 0.1599         | $\pi_G\pi_G^{*C}$ |        | S <sub>3</sub>  | 4.75        | 0.1837        | $\pi_A\pi_A^*$ |
|        | S <sub>5</sub>  | 5.21        | 0.0006         | $n_C^G\pi_C^*$    |        | S <sub>5</sub>  | 4.82        | 0.0005        | $n_T^A\pi_T^*$ |
|        | S <sub>7</sub>  | 5.30        | 0.0010         | $n_G^C\pi_G^{*C}$ |        | S <sub>8</sub>  | 5.64        | 0.0013        | $n_A^T\pi_A^*$ |
|        | S <sub>8</sub>  | <b>5.36</b> | <b>0.0101</b>  | $\pi_G\pi_C^*$    |        | S <sub>16</sub> | <b>6.12</b> | <b>0.0140</b> | $\pi_A\pi_T^*$ |
| G-1C   | S <sub>1</sub>  | 3.97        | 0.2854         | $\pi_C\pi_C^*$    | A-1T   | S <sub>1</sub>  | 4.02        | 0.2265        | $\pi_T\pi_T^*$ |
|        | S <sub>4</sub>  | 4.63        | 0.1440         | $\pi_G\pi_G^{*C}$ |        | S <sub>4</sub>  | 4.75        | 0.0000        | $n_T^A\pi_T^*$ |
|        | S <sub>7</sub>  | <b>5.13</b> | <b>0.1901</b>  | $\pi_G\pi_C^*$    |        | S <sub>5</sub>  | 4.97        | 0.1594        | $\pi_A\pi_A^*$ |
|        | S <sub>8</sub>  | 5.16        | 0.0020         | $n_C^G\pi_C^*$    |        | S <sub>9</sub>  | 5.64        | 0.0015        | $n_A^T\pi_A^*$ |
|        | S <sub>9</sub>  | 5.28        | 0.0009         | $n_G^C\pi_G^{*C}$ |        | S <sub>15</sub> | <b>6.29</b> | <b>0.0420</b> | $\pi_A\pi_T^*$ |
| G-2C   | S <sub>1</sub>  | 3.91        | 0.2525         | $\pi_C\pi_C^*$    | A-2T   | S <sub>1</sub>  | 3.91        | 0.2780        | $\pi_T\pi_T^*$ |
|        | S <sub>2</sub>  | 4.64        | 0.1752         | $\pi_G\pi_G^{*C}$ |        | S <sub>2</sub>  | 4.75        | 0.1784        | $\pi_A\pi_A^*$ |
|        | S <sub>4</sub>  | 5.28        | 0.0011         | $n_G^C\pi_G^{*C}$ |        | S <sub>4</sub>  | 4.97        | 0.0003        | $n_T^A\pi_T^*$ |
|        | S <sub>6</sub>  | 5.45        | 0.0011         | $n_C^G\pi_C^*$    |        | S <sub>7</sub>  | 5.64        | 0.0011        | $n_A^T\pi_A^*$ |
|        | S <sub>8</sub>  | <b>5.55</b> | <b>0.0041</b>  | $\pi_G\pi_C^*$    |        | S <sub>18</sub> | <b>6.29</b> | <b>0.0790</b> | $\pi_A\pi_T^*$ |
| G-3C   | S <sub>1</sub>  | 4.31        | 0.4634         | $\pi_C\pi_C^*$    | A-3T   | S <sub>1</sub>  | 4.41        | 0.5414        | $\pi_T\pi_T^*$ |
|        | S <sub>2</sub>  | 4.64        | 0.1732         | $\pi_G\pi_G^*$    |        | S <sub>2</sub>  | 4.76        | 0.1383        | $\pi_A\pi_A^*$ |
|        | S <sub>6</sub>  | 5.49        | 0.0012         | $n_G^C\pi_G^*$    |        | S <sub>4</sub>  | 5.08        | 0.0002        | $n_T^A\pi_T^*$ |
|        | S <sub>7</sub>  | 5.30        | 0.0016         | $n_C^G\pi_C^*$    |        | S <sub>8</sub>  | 5.64        | 0.0010        | $n_A^T\pi_A^*$ |
|        | S <sub>14</sub> | <b>5.87</b> | <b>0.0023</b>  | $\pi_G\pi_C^*$    |        | S <sub>26</sub> | <b>6.70</b> | <b>0.0087</b> | $\pi_A\pi_T^*$ |
| G-4C   | S <sub>1</sub>  | 4.29        | 0.4231         | $\pi_C\pi_C^*$    | A-4T   | S <sub>1</sub>  | 4.41        | 0.4994        | $\pi_T\pi_T^*$ |
|        | S <sub>2</sub>  | 4.64        | 0.1725         | $\pi_G\pi_G^{*C}$ |        | S <sub>2</sub>  | 4.75        | 0.1272        | $\pi_A\pi_A^*$ |
|        | S <sub>4</sub>  | 5.29        | 0.0012         | $n_G^C\pi_G^{*C}$ |        | S <sub>4</sub>  | 4.95        | 0.0003        | $n_T^A\pi_T^*$ |
|        | S <sub>6</sub>  | 5.44        | 0.0009         | $n_C^G\pi_C^*$    |        | S <sub>7</sub>  | 5.64        | 0.0014        | $n_A^T\pi_A^*$ |
|        | S <sub>10</sub> | <b>5.66</b> | <b>0.00113</b> | $\pi_G\pi_C^*$    |        | S <sub>20</sub> | <b>6.46</b> | <b>0.6240</b> | $\pi_A\pi_T^*$ |

**Table S4.** Difference value of WC hydrogen bond Lengths (Å) between ground state and electron transfer excited state.

|          | G-nC                               |                                    |                                    | A-nT                               |                                    |
|----------|------------------------------------|------------------------------------|------------------------------------|------------------------------------|------------------------------------|
|          | O <sub>6</sub> ···H-N <sub>4</sub> | N <sub>1</sub> -H···N <sub>3</sub> | N <sub>1</sub> -H···O <sub>2</sub> | N <sub>6</sub> -H···O <sub>4</sub> | N <sub>1</sub> ···H-N <sub>3</sub> |
| Natural  | -0.021                             | -0.019                             | -0.006                             | -0.030                             | -0.010                             |
| <b>x</b> | -0.023                             | -0.020                             | -0.016                             | -0.039                             | -0.017                             |
| <b>1</b> | 0.007                              | -0.013                             | -0.015                             | -0.015                             | 0.006                              |
| <b>2</b> | -0.018                             | -0.014                             | 0.011                              | -0.027                             | -0.012                             |
| <b>3</b> | -0.042                             | -0.019                             | -0.017                             | -0.033                             | -0.014                             |
| <b>4</b> | -0.021                             | -0.009                             | -0.024                             | -0.029                             | -0.008                             |

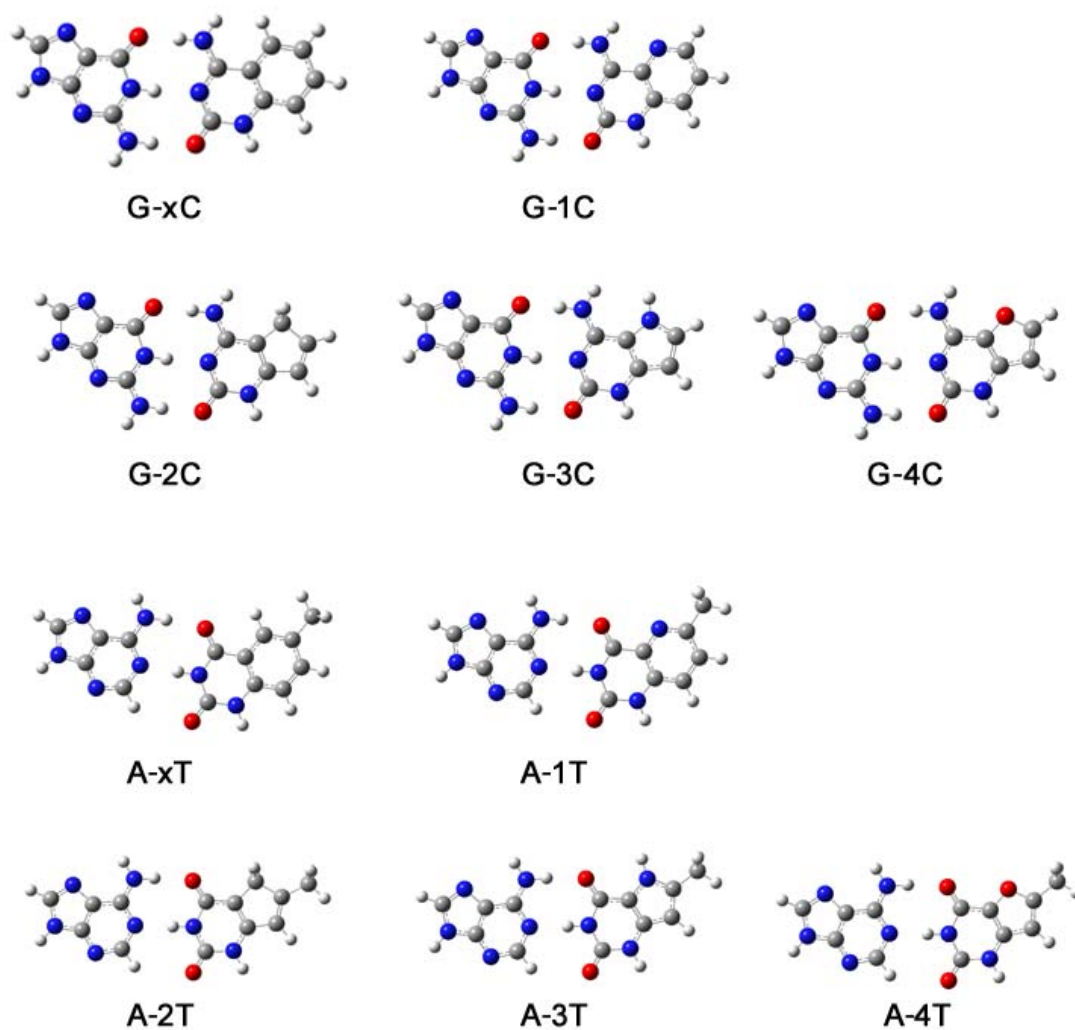

**Figure S1.** The optimized geometries of **G-nC** and **A-nT**.

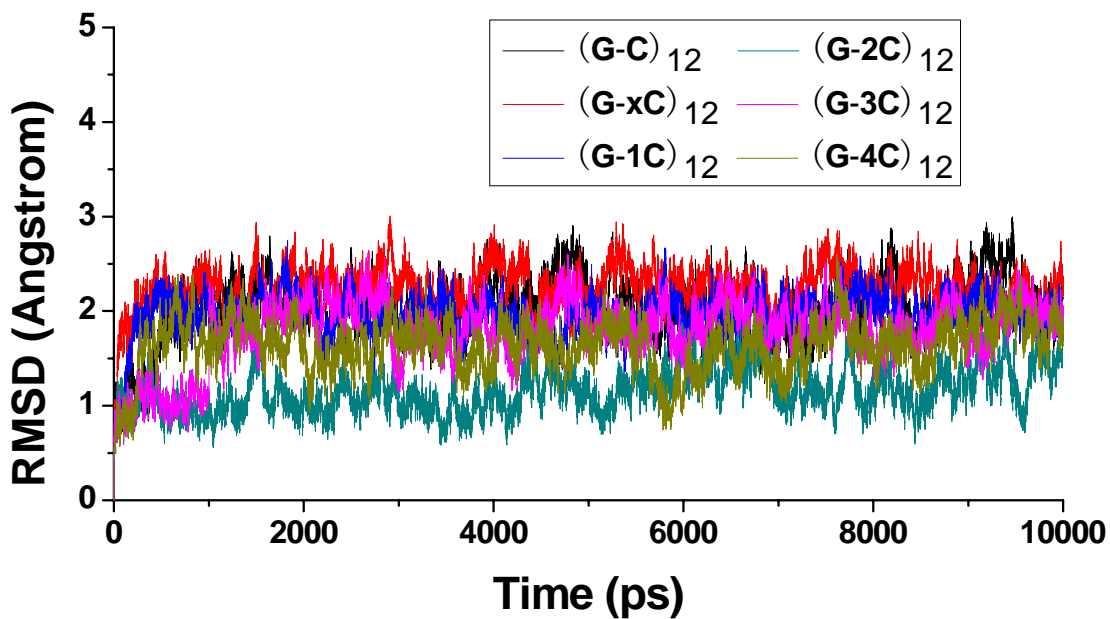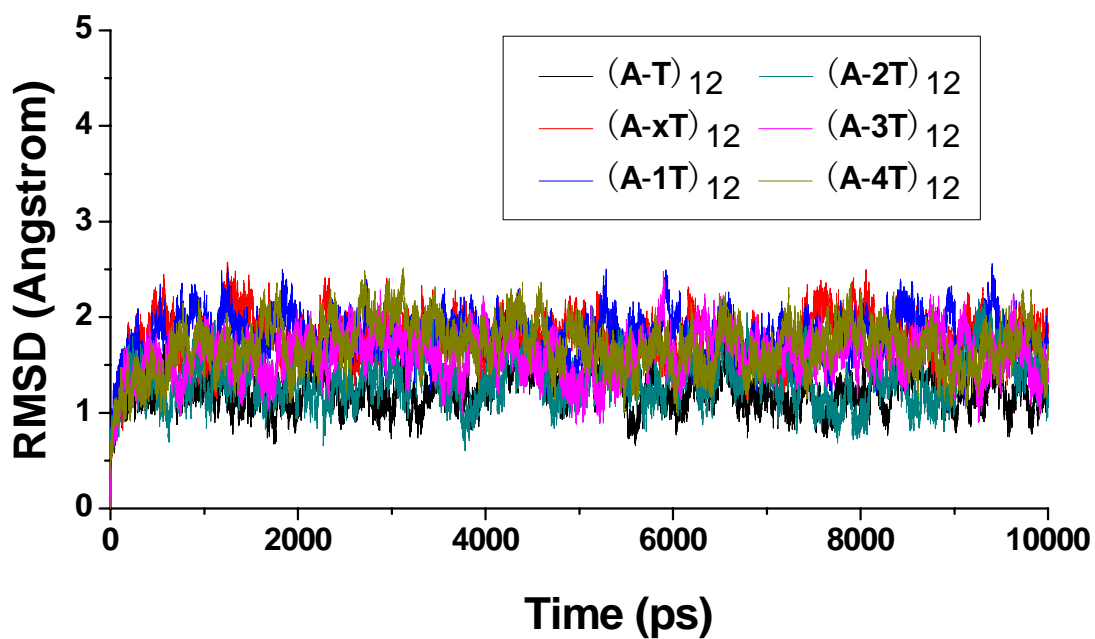

**Figure S2.** The all-atom root-mean-square deviations (RMSD) of the natural and the modified duplex helices over the MD simulations. The centre eight base pairs are considered with respect to the starting conformations.

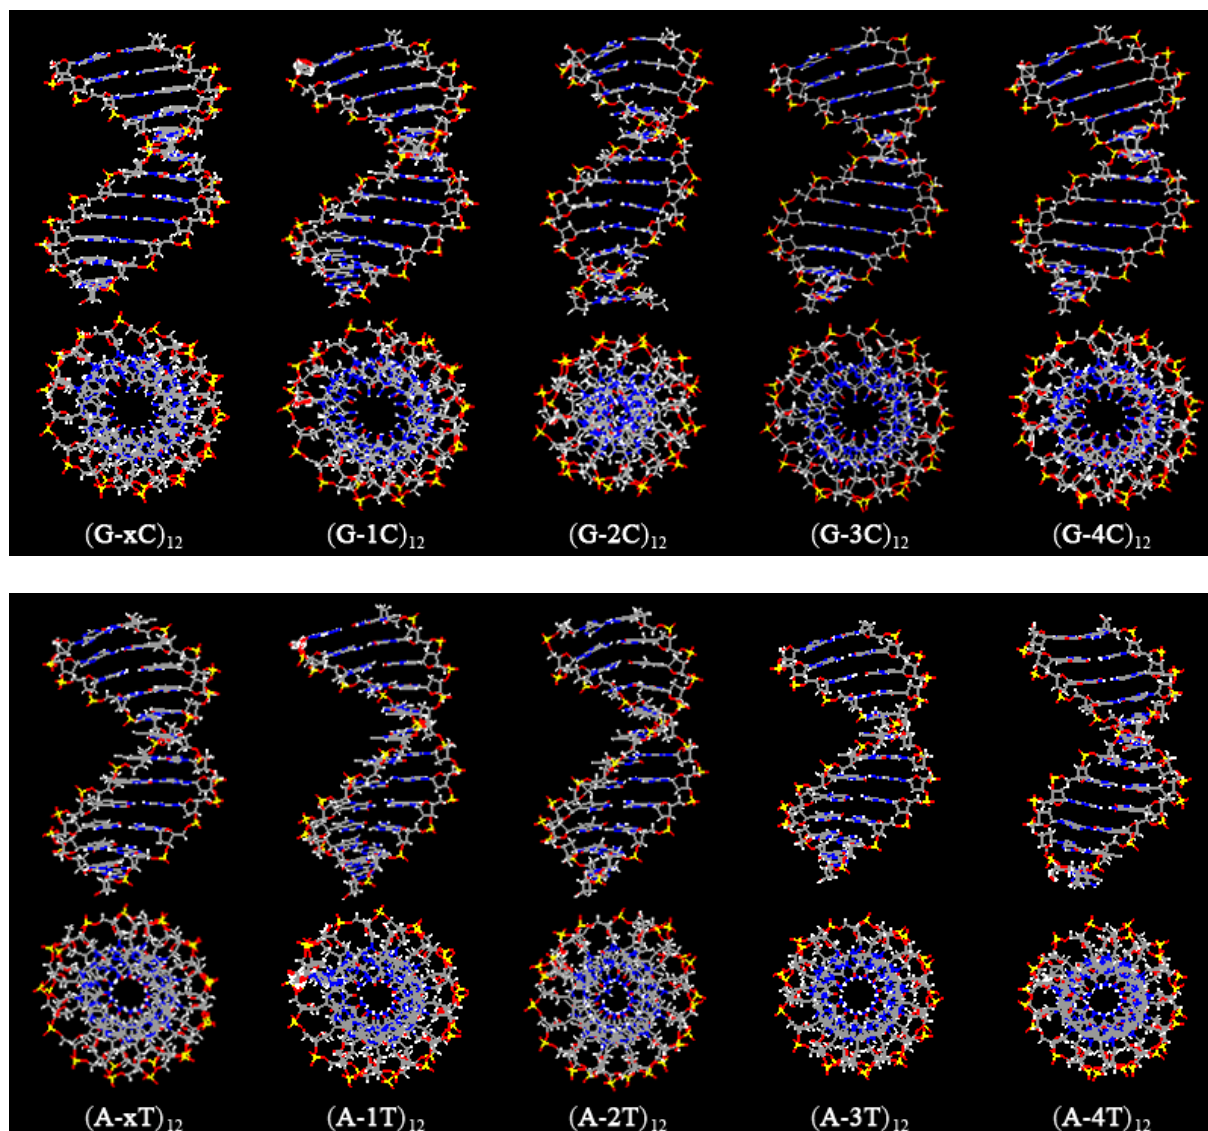

**Figure S3.** Average structures of  $(n\mathbf{C}\cdot\mathbf{G})_{12}$  and  $(n\mathbf{T}\cdot\mathbf{A})_{12}$ , which are generated from the last 2 ns of MD simulations.

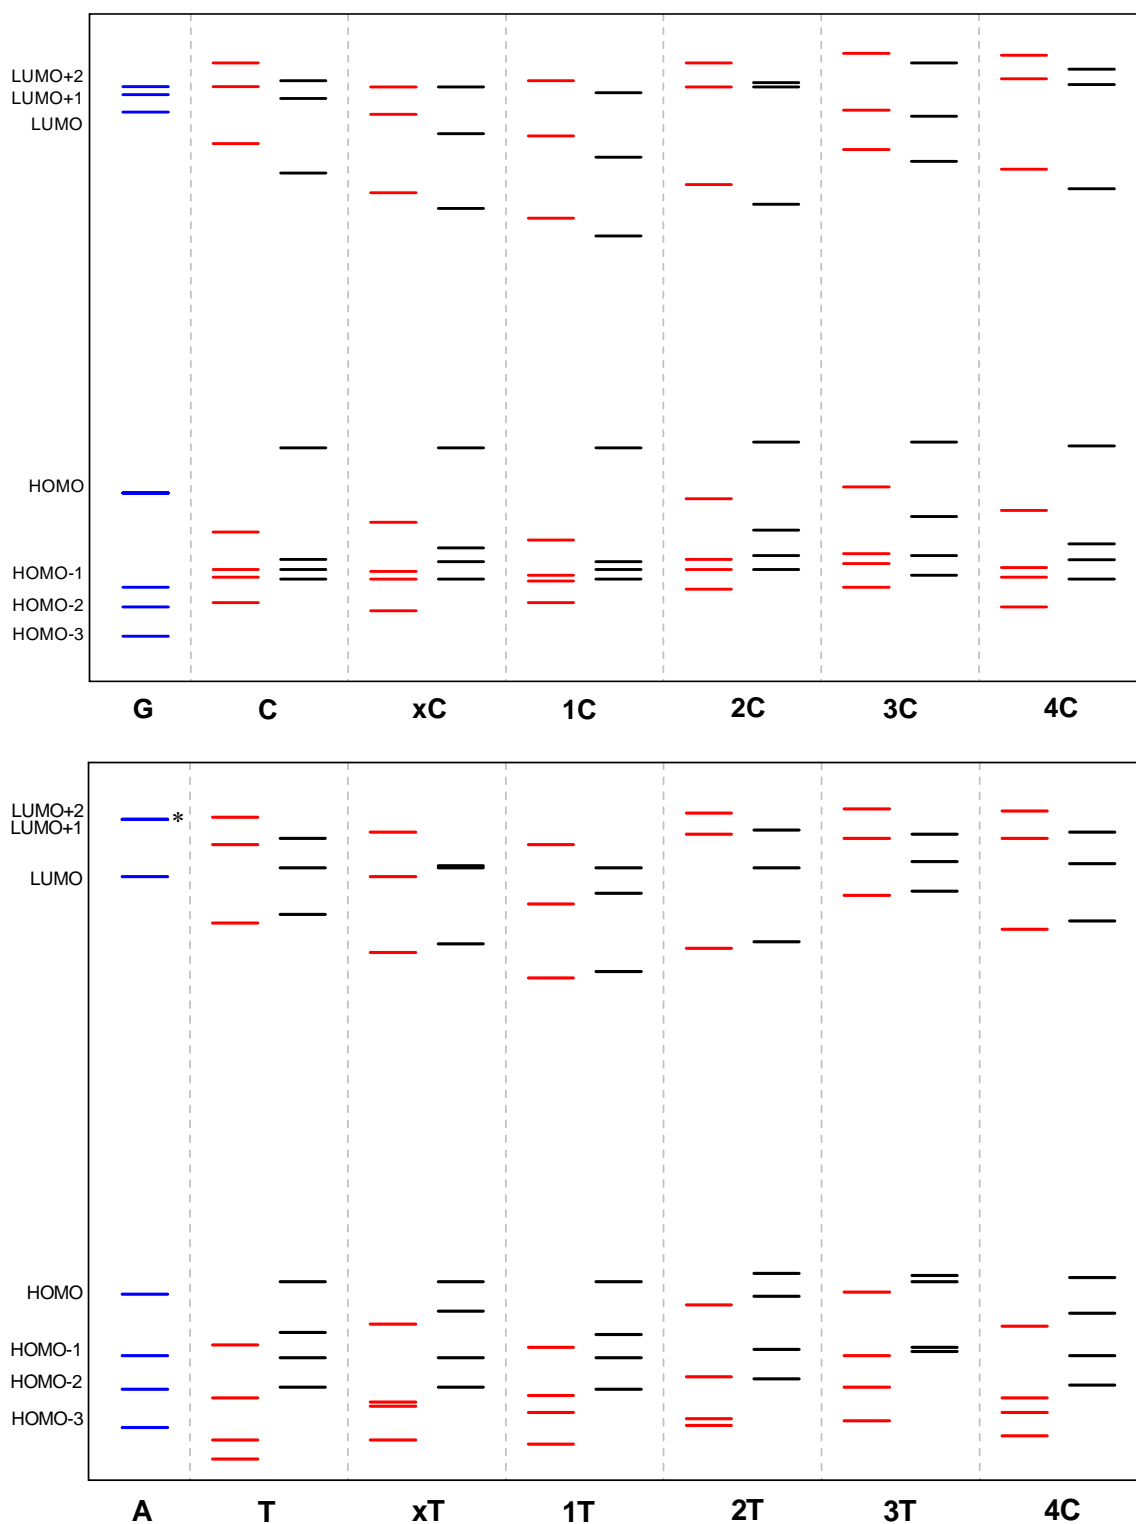

**Figure S4.** HOMO-3, HOMO-2, HOMO-1, HOMO, LUMO, LUMO+1 and LUMO+2 of bases and base pairs. The first blue column refers to orbital energies of natural guanine and adenine. The red lines of each column refer to orbital energies of natural and size-expanded cytosine and thymine. The black lines refer to orbital energies of corresponding base pairs. Note. \*These two energy levels are too close to distinguished.



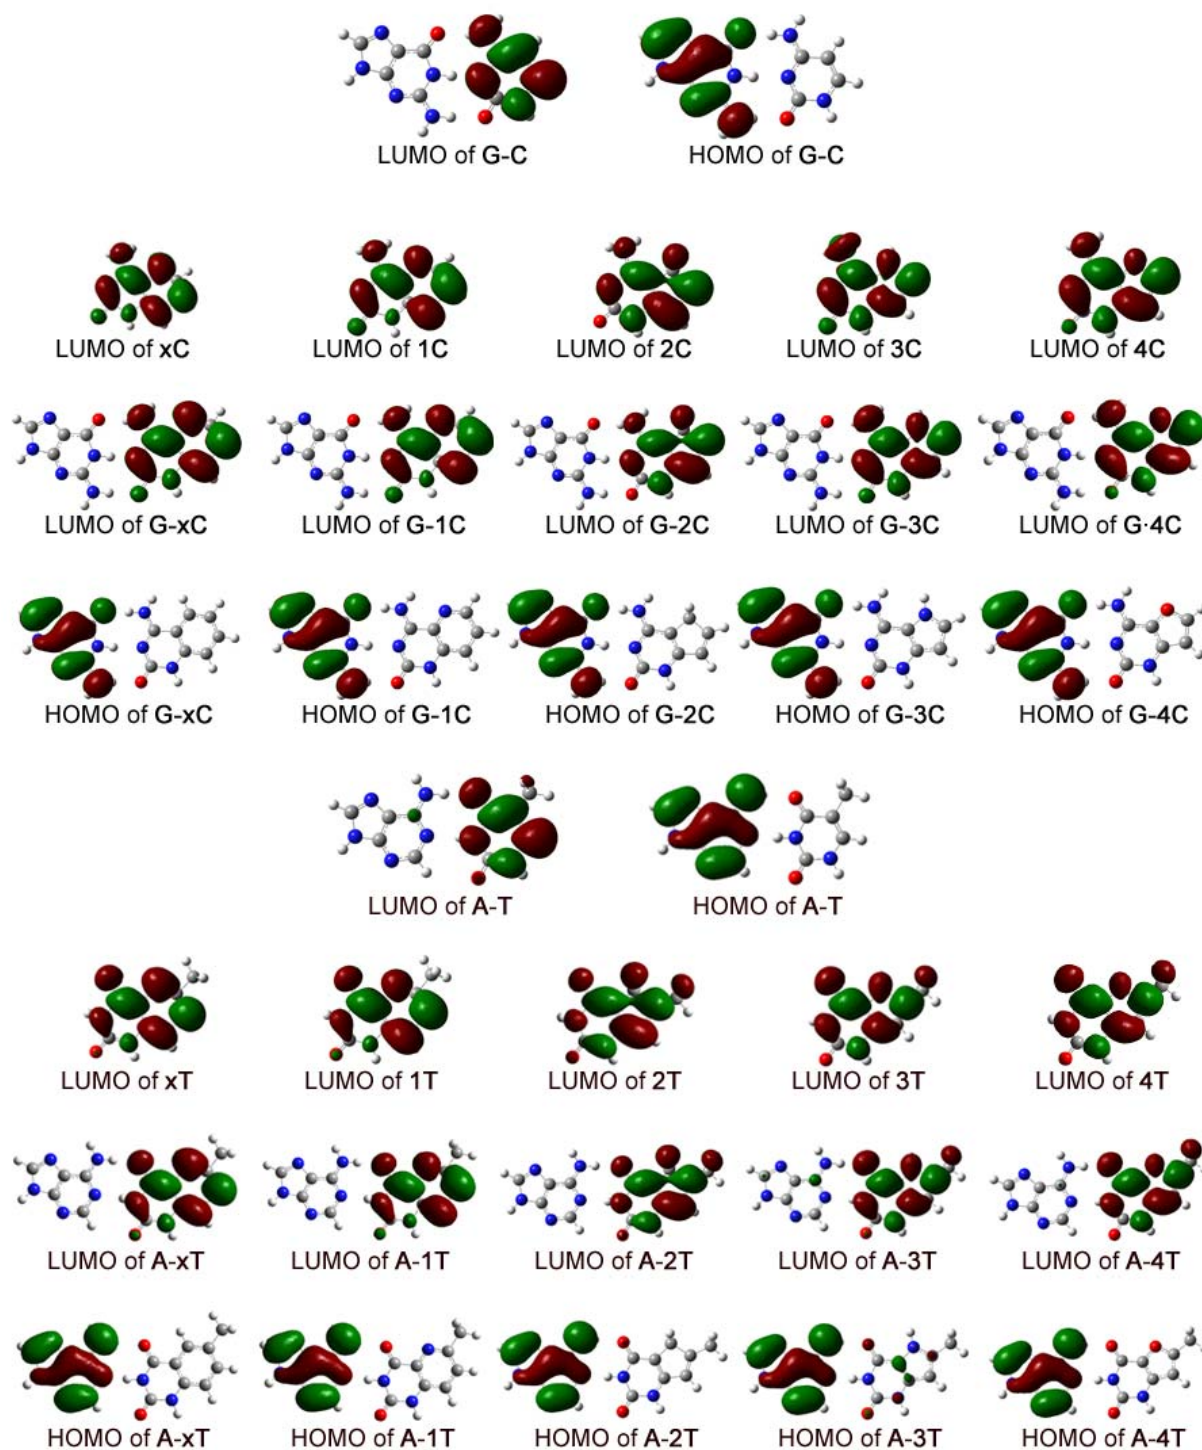

**Figure S5.** Frontier molecular orbitals of the natural and the size-expanded bases and base pairs.

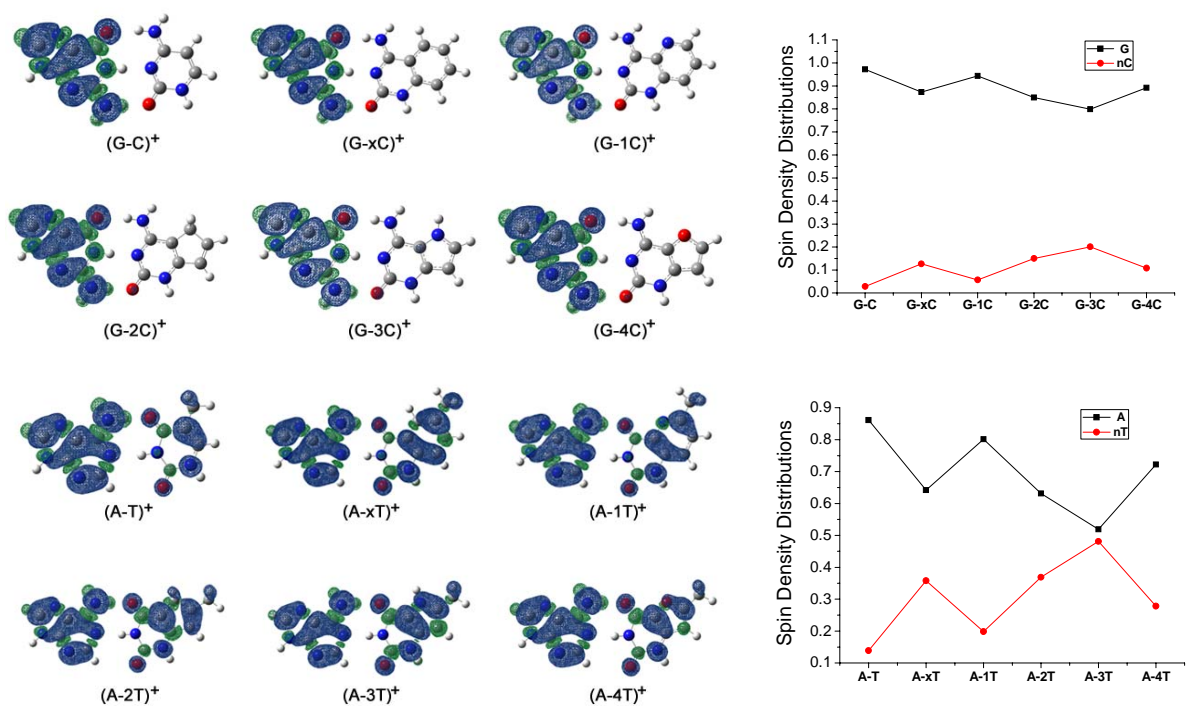

**Figure S6.** Spin density distributions of the oxidized natural and size-expanded G-C and A-T pairs.

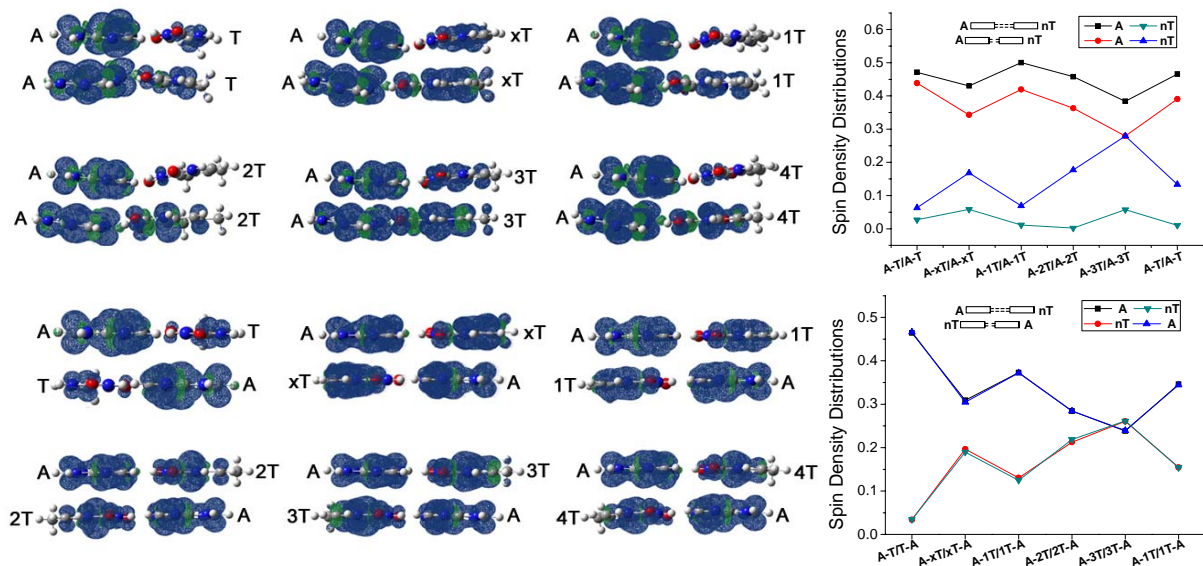

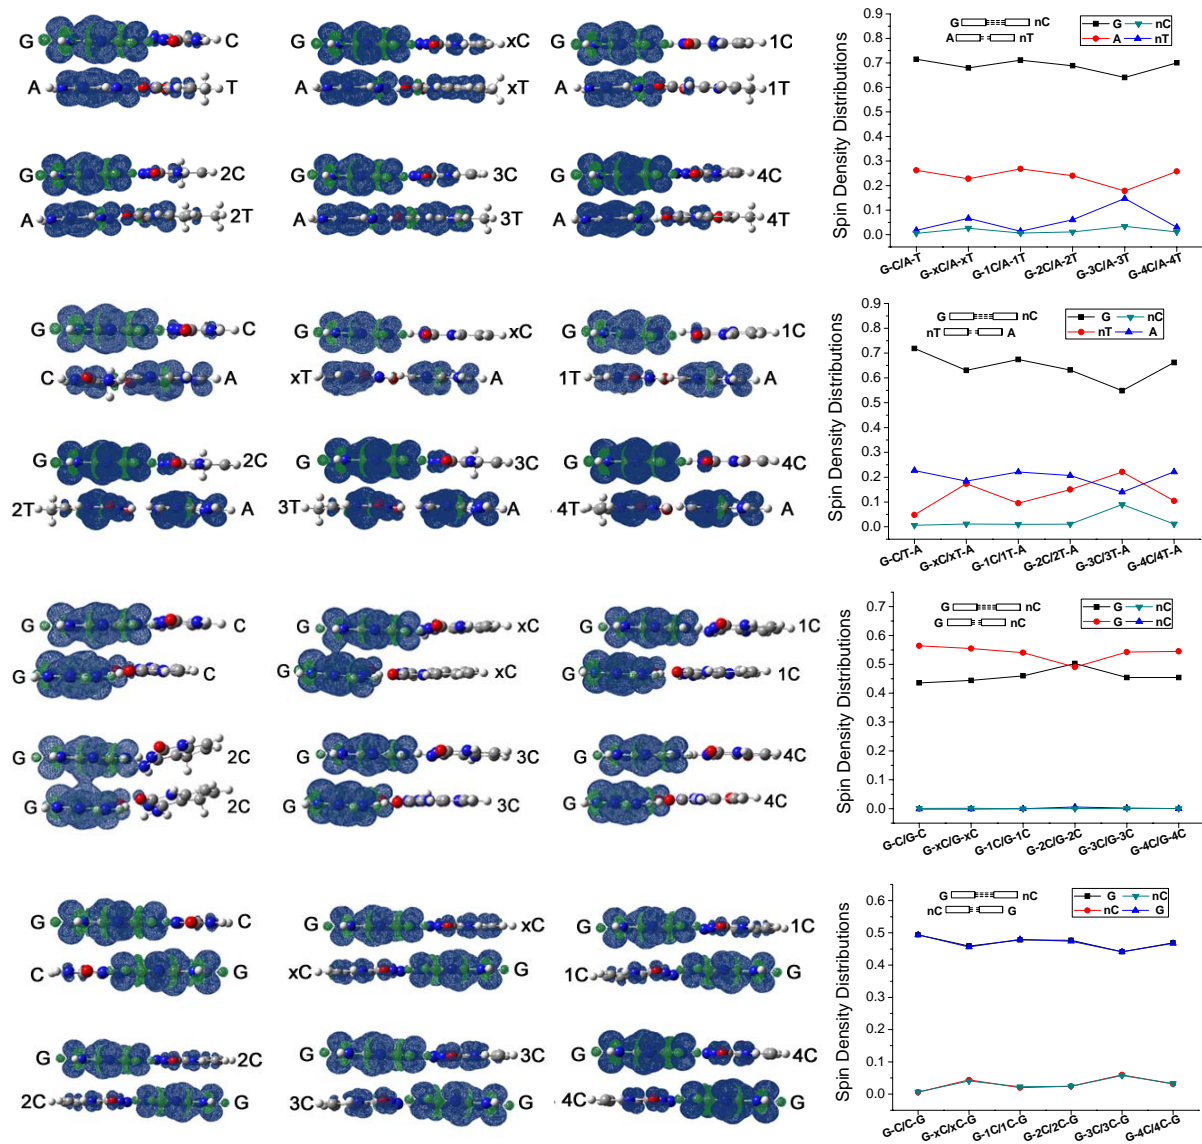

**Figure S7.** Spin density distribution of the oxidized natural and modified two-layer base pairs.



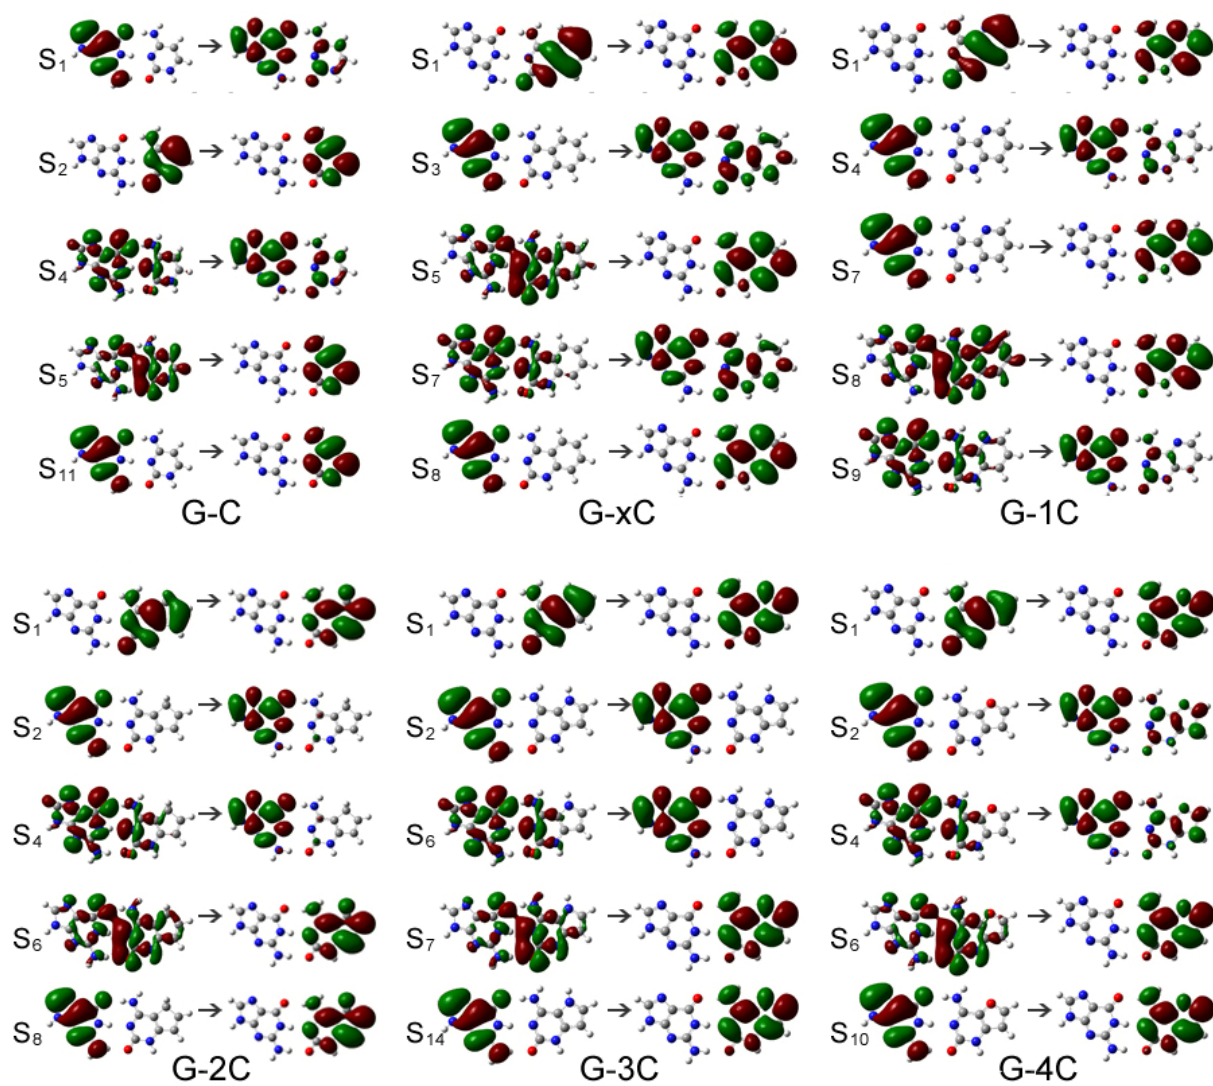

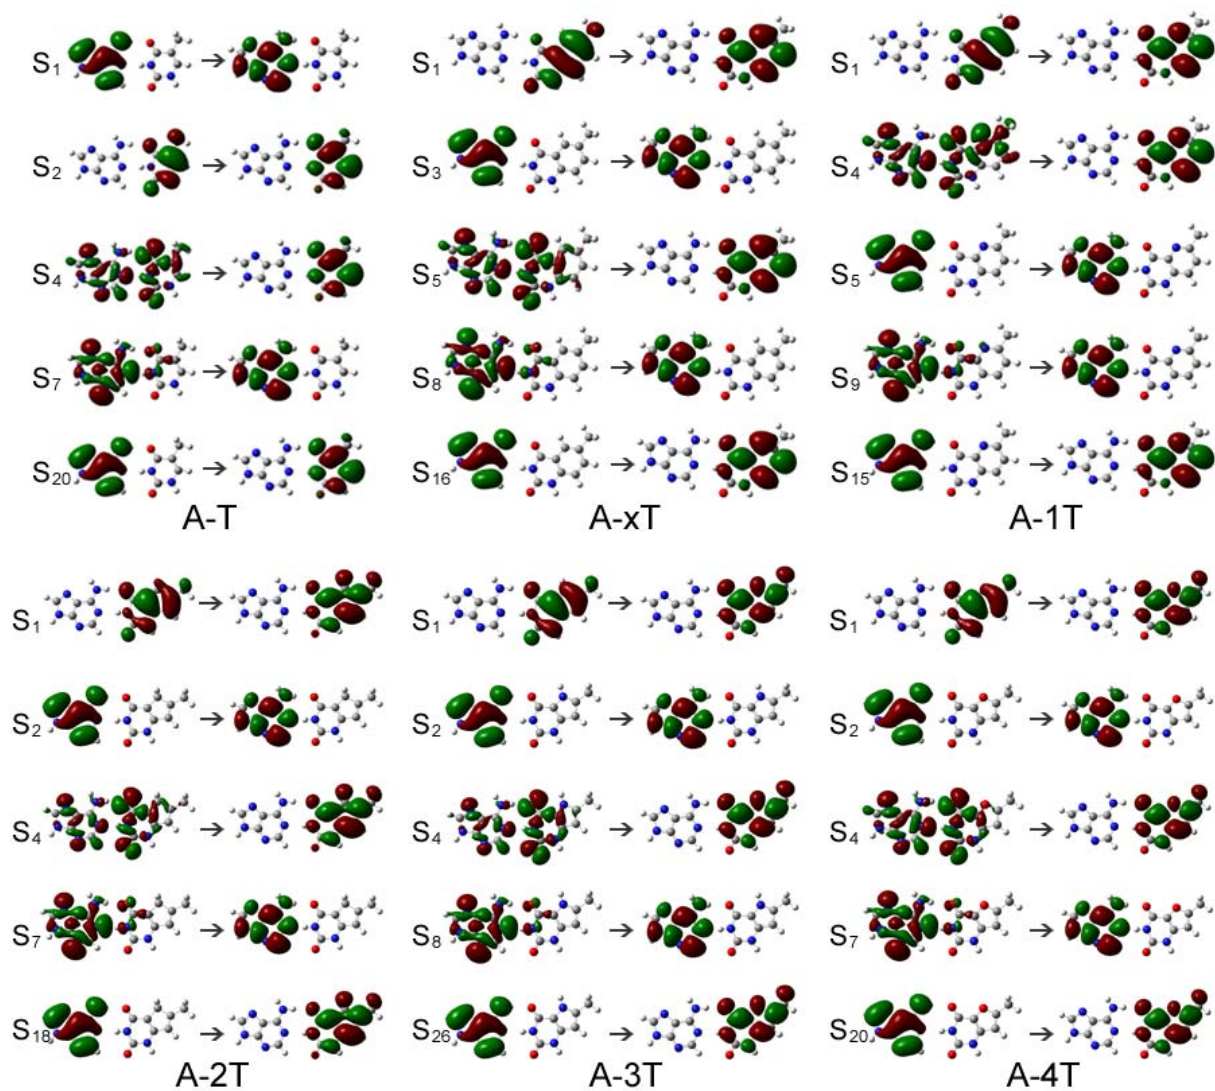

**Figure S8.** Molecular orbitals involved in several singlet transitions which were mentioned in Table S3.

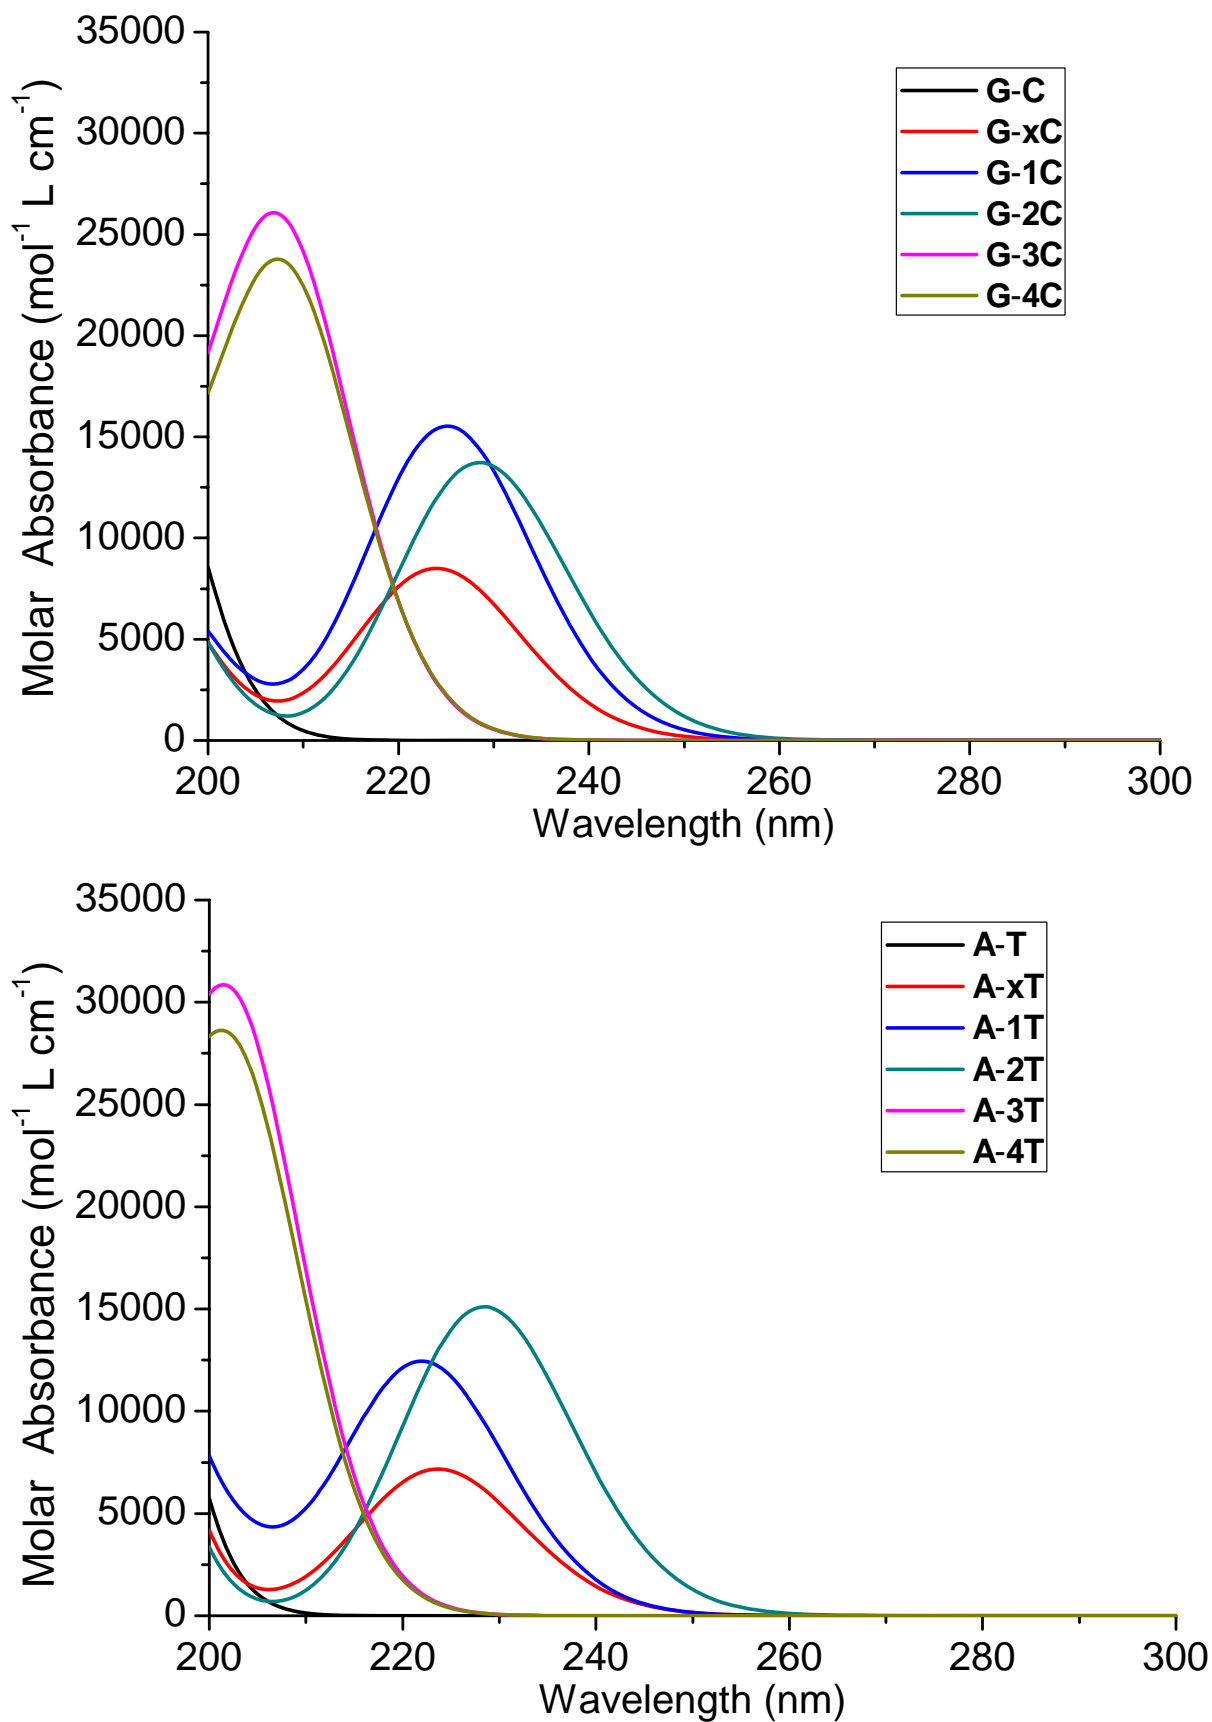

**Figure S9.** UV absorption spectra of the natural and the size-expanded G-C and A-T pairs.
